# Supplementary material
Source: publisher figshare collection journal article supplement (https://acs.figshare.com/ndownloader/files/25485409)
Supplement: Supplementary file 1 [file 25485409]

## Sheet: SWISS-M
The proteoforms covering SNV sites confidently identified from SWISS-M database
Protein ID	Transcript ID	Gene ID	Protein length	Prsm ID	Spectrum ID	Amino acid change	Position	Scan(s)	Precursor mass	Adjusted precursor mass	First residue	Last residue	Proteoform sequence	Proteoform length	Proteoform E-value	Proteoform P-value	Data file name
ENSP00000304697.3	ENST00000302182.7	ENSG00000170315.13	230	127	325	R->H	148	498	11890.1	11890.2	46	152	F.AGKQLEDGRTLSDYNIQKESTLHLVLRLRGG(M)[-99.2350]QIFVKTLTGKTITLEVEPSDTIENVKAKIQDKEGIPPDQQRLIFAGKQLEDGRTLSDYNIQKESTLHLVLHLRGG.M	107	9.30981e-05	9.30938e-05	./DLD_A_combined_ms2.msalign
ENSP00000358151.2	ENST00000369155.3	ENSG00000184678.10	127	234	462	A->T	8	712	13810.6	13810.5	2	126	M.PEPAKSTPAPKKGSKKAVTKAQKKDGKKRKRSRKESYSIYVYKVLKQVHPDTGISSKAMGIMNSFVNDIFERIAGEASRLAHYNKRSTITSREIQTAVRLLLPGELAKHAVSEGTKAVTKYTSSK.	125	8.3128e-19	8.3128e-19	./DLD_A_combined_ms2.msalign
ENSP00000339835.3	ENST00000340398.4	ENSG00000188375.4	136	430	701	L->F	104	1076	15345.6	15345.6	1	135	.(M)[Acetyl]ARTKQTARKSTGGKAPRKQLATKAARKSAPSTCGVKPHRYRPGTVALREIRRYQKSTELL(IRKLPFQRLVREIAQDFKTDLRFQSAAI)[67.1765]GALQEASEAYLVGLFEDTNLCAIHAKRVTIMPKDIQLARRIRGERA.	135	6.04588e-09	6.04588e-09	./DLD_A_combined_ms2.msalign
ENSP00000339835.3	ENST00000340398.4	ENSG00000188375.4	136	430	701	T->A	30	1076	15345.6	15345.6	1	135	.(M)[Acetyl]ARTKQTARKSTGGKAPRKQLATKAARKSAPSTCGVKPHRYRPGTVALREIRRYQKSTELL(IRKLPFQRLVREIAQDFKTDLRFQSAAI)[67.1765]GALQEASEAYLVGLFEDTNLCAIHAKRVTIMPKDIQLARRIRGERA.	135	6.04588e-09	6.04588e-09	./DLD_A_combined_ms2.msalign
ENSP00000451080.1	ENST00000557016.5	ENSG00000100632.10	105	507	810	S->G	55	1240	12132	12132	2	104	M.(S)[Acetyl]HTILLVQPTKRPEGRTYADYESVNECMEGVCKMYEEHLKRMNPNSPSITYDIGQLFDFIDDLADLSCLVYRADTQTYQPYNKDWIKEKIYVLLRRQAQQAGK.	103	1.73382e-18	1.73382e-18	./DLD_A_combined_ms2.msalign
ENSP00000367049.3	ENST00000377818.3	ENSG00000204899.5	83	663	1290	A->G	5	1960	8354.27	8354.27	2	82	M.(A)[Acetyl]SSGGAGAAAAAAAANLNAVRETMDVLLEISRILNTGLDMETLSICVRLCEQGINPEALSSVIKELRKATEALKAAENMTS.	81	8.1898e-07	8.1898e-07	./DLD_A_combined_ms2.msalign
ENSP00000322181.8	ENST00000314392.12	ENSG00000136908.17	85	730	1511	T->S	76	2291	9161.23	9161.23	2	84	M.ATGTDQVVGLGLVAVSLIIFTYYTAWVILLPFIDSQHVIHKYFLPRAYAVAIPLAAGLLLLLFVGLFISYVMLKSKRVTKKAQ.	83	1.3464e-17	1.3464e-17	./DLD_A_combined_ms2.msalign
ENSP00000256441.4	ENST00000256441.4	ENSG00000134056.11	104	825	1000249	E->G	103	377	11166.9	11166.9	1	103	.(M)[Acetyl](MGSKMASASRVV)[-262.0682]QVVKPHTPLIRFPDRRDNPKPNVSEALRSAGLPSHSSVISQHSKGSKSPDLLMYQGPPDTAEIIKTLPQKYRRKLVSQEEMEFIQRGGPG.	103	9.71555e-06	9.7155e-06	./DLD_A_combined_ms2.msalign
ENSP00000267884.6	ENST00000267884.10	ENSG00000140319.10	137	888	1000344	P->A	124	520	14403.8	14403.8	2	136	M.VLLESEQFLTELTRLFQKCRTSGSVYITLKKYDGRTKPIPKKGTVEGFEPADNKCLLRATDGKKKISTVVSSKEVNKFQMAYSNLLRANMDGLKKRDKKNKTKKTKAAAAAAAAAPAAAATAATTAATTAATAAQ.	135	9.138e-18	9.138e-18	./DLD_A_combined_ms2.msalign
ENSP00000341094.1	ENST00000341023.1	ENSG00000196866.2	131	1014	1000515	I->V	80	781	13994.9	13994.9	2	130	M.SGRGKQGGKARAKAKTRSSRAGLQFPV(GR)[41.0404]VHRLLRKGNYSERVGAGAPVYLAAVLEYLTAEILELAGNAARDNKKTRIVPRHLQLAIRNDEELNKLLGKVTIAQGGVLPNIQAVLLPKKTESHHKAKGK.	129	7.98336e-15	7.98336e-15	./DLD_A_combined_ms2.msalign
ENSP00000219169.4	ENST00000219169.8	ENSG00000102898.11	128	1279	1001037	E->D	8	1566	14366	14366	2	127	M.(G)[Acetyl]DKPIWDQIGSSFIQHYYQLFDNDRTQLGAIYIDASCLTWEGQQFQGKAAIVEKLSSLPFQKIQHSITAQDHQPTPDSCIISMVVGQLKADEDPIMGFHQMFLLKNINDAWVCTNDMFRLALHNFG.	126	1.55524e-11	1.55524e-11	./DLD_A_combined_ms2.msalign
ENSP00000470004.1	ENST00000593863.5	ENSG00000105372.7	146	1520	2000374	V->F	4	567	15966.5	15966.5	2	145	M.PGFTVKDVNQQEFVRALAAFLKKSGKLKVPEWVDTVKLAKHKELAPYDENWFYTRAASTARHLYLRGGAGVGSMTKIYGGRQRNGVMPSHFSRGSKSVARRVLQALEGLKMVEKDQDGGRKLTPQGQRD(LDRIAGQVAAAN)[-0.9719]KKH.	144	1.22257e-07	1.22257e-07	./DLD_A_combined_ms2.msalign
ENSP00000339835.3	ENST00000340398.4	ENSG00000188375.4	136	1681	2000644	C->G	34	977	15358.6	15358.7	2	135	M.(A)[Acetyl]RTKQTARKSTGGKAPRKQLATKAARKSTPSTGGVKPHRYRPGTVALREI(RRYQKSTELLIRKLPFQRLVREIAQDFKTDLRFQSAAIG)[227.2954]ALQEASEAYLVGLFEDTNLCAIHAKRVTIMPKDIQLARRIRGERA.	134	2.85854e-06	2.85854e-06	./DLD_A_combined_ms2.msalign
ENSP00000358674.4	ENST00000369660.8	ENSG00000102178.12	158	1710	2000687	L->M	127	1041	17783.5	17783.5	1	157	.MQLTVKALQGRECSLQVPEDELVSTLKQLVSEKLNVPVRQQRLLFKGKALADGKRLSDYSIGPNSKLNLVVKPLEKVLLEEGEAQRLADSPPPQVWQLISKVLARHFSAADASRVLEQLQRDYERSMSRLTLDDIERLASRFLHPEVTETMEKGFSK.	157	1.02184e-06	1.02184e-06	./DLD_A_combined_ms2.msalign
ENSP00000368699.4	ENST00000379389.4	ENSG00000187608.8	166	1736	2000726	S->N	83	1100	17031	17031	2	157	M.GWDLTVKMLAGNEFQVSLSSSMSVSELKAQITQKIGVHAFQQRLAVHPSGVALQDRVPLASQGLGPGSTVLLVVDKCDEPLNILVRNNKGRSSTYEVRLTQTVAHLKQQVSGLEGVQDDLFWLTFEGKPLEDQLPLGEYGLKPLSTVFMNLRLRGG.G	156	1.26364e-24	1.26364e-24	./DLD_A_combined_ms2.msalign
ENSP00000355124.3	ENST00000361566.7	ENSG00000171345.13	401	1842	2000888	P->T	241	1343	18377.2	18377.2	241	400	A.TGTDLAKILSDMRSQYEVMAEQNRKDAEAWFTSRTEELNREVAGHTEQLQMSRSEV(TD)[157.0938]LRRTLQGLEIELQSQLSMKAALEDTLAETEARFGAQLAHIQALISGIEAQLGDVRADSERQNQEYQRLMDIKSRLEQEIATYRSLLEGQEDHYNNLSASKVL.	160	0.0484628	0.0473075	./DLD_A_combined_ms2.msalign
ENSP00000360473.2	ENST00000371419.6	ENSG00000101132.9	135	1914	2001122	F->L	17	1694	15181.6	15181.6	2	134	M.(A)[Acetyl]ATMKKAAAEDVNVTLEDQQKINKFARNTSRITELKEEIEVKKKQLQNLEDACDDIMLADDDCLMIPYQIGDVFISHSQEETQEMLEEAKKNLQEEIDALESRVESIQRVLADLKVQLYAKFGSNINLEADES.	133	1.20688e-07	1.20688e-07	./DLD_A_combined_ms2.msalign
ENSP00000328973.4	ENST00000329563.8	ENSG00000100300.17	170	1964	2001353	T->A	147	2040	18654.6	18654.6	2	169	M.APPWVPAMGFTLAPSLGCFVGSRFVHGEGLRWYAGLQKPSWHPPHWVLGPVWGTLYSAMGYGSYLVWKELGGFTEKAVVPLGLYTGQLALNWAWPPIFFGARQMGWALVDLLLVSGAAAATTVAWYQVSPLAARLLYPYLAWLAFATTLNYCVWRDNHGWRGGRRLPE.	168	1.69576e-15	1.69576e-15	./DLD_A_combined_ms2.msalign
ENSP00000262061.2	ENST00000262061.6	ENSG00000111481.9	178	1971	2001364	R->W	54	2057	20257.5	20257.5	1	177	.(M)[Acetyl]EALILEPSLYTVKAILILDNDGDRLFAKYYDDTYPSVKEQKAFEKNIFNKTHWTDSEIALLEGLTVVYKSSIDLYFYVIGSSYENELMLMAVLNCLFDSLSQMLRKNVEKRALLENMEGLFLAVDEIVDGGVILESDPQQVVHRVALRGEDVPLTEQTVSQVLQSAKEQIKWSLLR.	177	3.1144e-25	3.1144e-25	./DLD_A_combined_ms2.msalign
ENSP00000265260.3	ENST00000265260.7	ENSG00000081154.11	179	2111	3000256	S->F	87	392	18963.4	18963.4	2	178	M.(A)[Acetyl]DGKAGDEKPEKSQRAGAAGGPEEEAEKPVKTKTVSSSNGGESSSRSAEKRSAEEEAADLPTKPTKISKFGFAIGSQTTKKASAIFIKLGSSKPKETVPTLAPKTLSVAAAFNEDE(DSE)[79.0291]PEEMPPEAKMRMKNIGRDTPTSAGPNSFNKGKHGFSDNQKLWERNIKSHLGNVHDQDN.	177	0.00819332	0.00815987	./DLD_A_combined_ms2.msalign
ENSP00000253023.2	ENST00000253023.7	ENSG00000130725.7	184	2385	3000748	G->D	171	1131	20986.7	20986.7	1	183	.(M)[Acetyl]IKLFSLKQQKKEEESAGGTKGSSKKASAAQLRIQKDINELNLPKTCDISFSDPDDLLNFKLVICPDEGFYKSGKFVFSFKVGQGYPHDPPKVKCETMVYHPNIDLEGNVCLNILREDWKPVLTINSIIYGLQYLFLEPNPEDPLNKEAAEVLQNNRRLFEQNVQRSMRGDYIGSTYFERCLK.	183	2.9566e-08	2.9566e-08	./DLD_A_combined_ms2.msalign
ENSP00000400175.1	ENST00000418115.5	ENSG00000067560.10	194	2443	3000851	S->I	88	1285	21651.1	21651.1	2	193	M.(A)[Acetyl]AIRKKLVIVGDGACGKTCLLIVFSKDQFPEVYVPTVFENYVADIEVDGKQVELALWDTAGQEDYDRLRPLSYPDTDVILMCFSIDIPDSLENIPEKWTPEVKHFCPNVPIILVGNKKDLRNDEHTRRELAKMKQE(PVKPEEGRDMANRIGA)[-39.9552]FGYMECSAKTKDGVREVFEMATRAALQARRGKKKSGCLVL.	192	0.00062472	0.000624525	./DLD_A_combined_ms2.msalign
ENSP00000335636.4	ENST00000334982.8	ENSG00000173418.11	179	2549	3001110	Y->H	137	1674	20240.1	20240.1	2	178	M.(T)[Acetyl]TLRAFTCDDLFRFNNINLDPLTETYGIPFYLQYLAHWPEYFIVAEAPGGELMGYIMGKAEGSVAREEWHGHVTALSVAPEFRRLGLAAKLMELLEEISERKGGFFVDLFVRVSNQVAVNMYKQLGYSVYRTVIEHYSASNGEPDEDAYDMRKALSRDTEKKSIIPLPHPVRPEDIE.	177	0.09699	0.0946382	./DLD_A_combined_ms2.msalign
ENSP00000493902.1	ENST00000645668.1	ENSG00000198860.12	172	2579	3001197	G->D	19	1804	18738.2	18738.2	1	171	.(M)[Acetyl]EERGDSEPTPGCSGLGPDGVRGFGDGGGAPSWAPEDAWMGTHPKYLEMMELDIGDATHVYVAFLVYLDLMESKSWHEVNCVGLPELQLICLVGTEIEGEGLQTVVPTPITASLSHNRIREILKASRKLQGDPDLPMSFTLAIVESDSTIVYYKLTDGFMLPDPQNISLRR.	171	1.671e-05	1.67099e-05	./DLD_A_combined_ms2.msalign
ENSP00000493902.1	ENST00000645668.1	ENSG00000198860.12	172	2579	3001197	Q->H	59	1804	18738.2	18738.2	1	171	.(M)[Acetyl]EERGDSEPTPGCSGLGPDGVRGFGDGGGAPSWAPEDAWMGTHPKYLEMMELDIGDATHVYVAFLVYLDLMESKSWHEVNCVGLPELQLICLVGTEIEGEGLQTVVPTPITASLSHNRIREILKASRKLQGDPDLPMSFTLAIVESDSTIVYYKLTDGFMLPDPQNISLRR.	171	1.671e-05	1.67099e-05	./DLD_A_combined_ms2.msalign
ENSP00000219204.3	ENST00000219204.7	ENSG00000102931.7	164	2592	3001290	E->K	87	1944	18851.1	18851.2	1	163	.(M)[Acetyl]DALEGESFALSFSSASDAEFDAVVGYLEDIIMDDEFQLLQRNFMDKYYLEFEDTEENKLIYTPIFNEYISLVEKYIEEQLLQRIPKFNMAAFTTTLQHHKDEVAGDIFDMLLTFTDFLAFKEMFLDYRAEKEGRGLDLSSGLVVTSLCKSSSLPASQNNLRH.	163	1.8848e-09	1.8848e-09	./DLD_A_combined_ms2.msalign
ENSP00000419475.1	ENST00000473414.5	ENSG00000114744.8	200	2598	3001321	L->F	173	1990	22765.1	22765.1	1	199	.MLLELSEEHKEHLAFLPQVDSAVVAEFGRIAVEFLRRGANPKIYEGAARKLNVSSDTVQHGVEGLTYLLTESSKLMISELDFQDSVFVLGFSEELNKLLLQLYLDNRKEIRTILSELAPSLPSYHNLEWRLDVQLASRSLRQQIKPAVTIKLHLNQNGDHNTKVLQTDPATLFHLVQQLEQALEEMKTNHCRRVVRNIK.	199	0.045132	0.0446228	./DLD_A_combined_ms2.msalign
ENSP00000254301.9	ENST00000254301.13	ENSG00000131981.15	251	2867	4000498	P->H	64	755	26083.1	26083	2	250	M.(A)[Acetyl]DNFSLHDALSGSGNPNPQGWPGAWGNQPAGAGGYPGASYPGAYPGQAPPGAYPGQAPPGAYHGAPGAYPGAPAPGVYPGPPSGPGAYPSSGQPSAPGAYPATGPYGAPAGPLIVPYNLPLPGGVVPRMLITILGTVKPNANRIALDFQRGNDVAFHFNPRFNENNRRVIVCNTKLDNNWGREERQSVFPFESGKPFKIQVLVEPDHFKVAVNDAHLLQYNHRVKKLNEISKLGISGDIDLTSASYTMI.	249	1.42544e-15	1.42544e-15	./DLD_A_combined_ms2.msalign
ENSP00000254301.9	ENST00000254301.13	ENSG00000131981.15	251	2867	4000498	T->P	98	755	26083.1	26083	2	250	M.(A)[Acetyl]DNFSLHDALSGSGNPNPQGWPGAWGNQPAGAGGYPGASYPGAYPGQAPPGAYPGQAPPGAYHGAPGAYPGAPAPGVYPGPPSGPGAYPSSGQPSAPGAYPATGPYGAPAGPLIVPYNLPLPGGVVPRMLITILGTVKPNANRIALDFQRGNDVAFHFNPRFNENNRRVIVCNTKLDNNWGREERQSVFPFESGKPFKIQVLVEPDHFKVAVNDAHLLQYNHRVKKLNEISKLGISGDIDLTSASYTMI.	249	1.42544e-15	1.42544e-15	./DLD_A_combined_ms2.msalign
ENSP00000376176.2	ENST00000392369.6	ENSG00000132341.11	217	2904	4000566	N->S	156	857	24291.7	24291.6	2	216	M.(A)[Acetyl]AQGEPQVQFKLVLVGDGGTGKTTFVKRHLTGEFEKKYVATLGVEVHPLVFHTNRGPIKFNVWDTAGQEKFGGLRDGYYIQAQCAIIMFDVTSRVTYKNVPNWHRDLVRVCENIPIVLCGNKVDIKDRKVKAKSIVFHRKKNLQYYDISAKSNYSFEKPFLWLARKLIGDPNLEFVAMPALAPPEVVMDPALAAQYEHDLEVAQTTALPDEDDDL.	215	3.7088e-06	3.7088e-06	./DLD_A_combined_ms2.msalign
ENSP00000368391.3	ENST00000379097.7	ENSG00000076554.15	225	2979	4000839	A->T	99	1267	19892.3	19892.2	41	224	S.PTLQKFGLLRTD(PVPE)[12.8994]EGEDVAATISATETLSEEEQEELRRELAKVEEEIQTLSQVLATKEKHLAEIKRKLGINSLQELKQNIAKGWQDVTATSAYKKTSETLSQAGQKASAAFSSVGSVITKKLEDVKNSPTFKSFEEKVENLKSKVGGTKPAGGDFGEVLNSAANASATTTEPLPEKTQESL.	184	0.000588041	0.000587868	./DLD_A_combined_ms2.msalign
ENSP00000379933.4	ENST00000396705.9	ENSG00000111669.14	250	2981	4000841	P->L	179	1270	26520.7	26520.7	2	249	M.APSRKFFVGGNWKMNGRKQSLGELIGTLNAAKVPADTEVVCAPPTAYIDFARQKLDPKIAVAAQNCYKVTNGAFTGEISPGMIKDCGATWVVLGHSERRHVFGESDELIGQKVA(HALAEGL)[-17.0185]GVIACIGEKLDEREAGITEKVVFEQTKVIADNVKDWSKVVLAYEPVWAIGTGKTATLQQAQEVHEKLRGWLKSNVSDAVAQSTRIIYGGSVTGATCKELASQPDVDGFLVGGASLKPEFVDIINAKQ.	248	3.53041e-08	3.53041e-08	./DLD_A_combined_ms2.msalign
ENSP00000357535.3	ENST00000368547.3	ENSG00000127884.4	291	3057	4001231	V->A	11	1855	28336.5	28336.5	28	290	F.ASGANFEYIIAEKRGKNNTVGLIQLNRPKALNALCDGLIDELNQALKIFEEDPAVGAIVLTGGDKAFAAGADIKEMQNLSFQDCYSSKFLKHWDHLTQVKKPVIAAVNGYAFGGGCELAMMCDIIYAGEKAQFAQPEILIGTIPGAGGTQRLTRAVGKSLAMEMVLTGDRISAQDAKQAGLVSKICPVETLVEEAIQCAEKIASNSKIVVAMAKESVNAAFEMTLTEGSKLEKKLFYSTFATDDRKEGMTAFVEKRKANFKDQ.	263	5.46592e-11	5.46592e-11	./DLD_A_combined_ms2.msalign
ENSP00000357535.3	ENST00000368547.3	ENSG00000127884.4	291	3057	4001231	T->I	75	1855	28336.5	28336.5	28	290	F.ASGANFEYIIAEKRGKNNTVGLIQLNRPKALNALCDGLIDELNQALKIFEEDPAVGAIVLTGGDKAFAAGADIKEMQNLSFQDCYSSKFLKHWDHLTQVKKPVIAAVNGYAFGGGCELAMMCDIIYAGEKAQFAQPEILIGTIPGAGGTQRLTRAVGKSLAMEMVLTGDRISAQDAKQAGLVSKICPVETLVEEAIQCAEKIASNSKIVVAMAKESVNAAFEMTLTEGSKLEKKLFYSTFATDDRKEGMTAFVEKRKANFKDQ.	263	5.46592e-11	5.46592e-11	./DLD_A_combined_ms2.msalign
ENSP00000221233.3	ENST00000221233.8	ENSG00000077348.8	236	3112	4001504	T->M	5	2264	25304.9	25304.9	1	235	.(M)[Acetyl]EEEMHTDAKIRAENGTGSSPRGPGCSLRHFACEQNLLSRPDGSASFLQGDTSVLAGVYGPAEVKVSKEIFNKATLEVILRPKIGLPGVAEKSRERLIRNTCEAVVLGTLHPRTSITVVLQVVSDAGSLLACCLNAACMALVDAGVPMRALFCGVACALDSDGTLVLDPTSKQEKEARAVLTFALDSVERKLLMSSTKGLYSDTELQQCLAAAQAASQHVFRFYRESLQRRYSKS.	235	0.000389492	0.000389435	./DLD_A_combined_ms2.msalign
ENSP00000245983.2	ENST00000245983.6	ENSG00000125787.11	121	3298	5000897	H->Y	25	1373	12935.7	12935.7	1	120	.MASSRRGLLLLLLLTAHLGPSEAQYWSHGWYPGGKRALSSAQDPQNALRPPGRALDTAAGSPVQTAHGLPSDALAPLDDSMPWEGRTTAQWSLHRKRHLARTLLTAAREPRPAPPSSNKV.	120	0.380784	0.329861	./DLD_A_combined_ms2.msalign
ENSP00000355124.3	ENST00000361566.7	ENSG00000171345.13	401	3428	6000842	A->G	60	1283	7329.71	7329.82	2	79	M.(T)[Acetyl]SYSYRQSSATSSFGGLGGGSVRFGPGVAFRAPSIHGGSGGRGVSVSSARFVSSSSSGGYGGGYGGVL(TA)[-92.7456]SDGLLAGN.E	78	0.0575496	0.0559254	./DLD_A_combined_ms2.msalign

## Sheet: BASIC-M
The proteoforms covering SNV sites confidently identified from BASIC-M database
Protein ID	Transcript ID	Gene ID	Protein length	Prsm ID	Spectrum ID	Amino acid change	Position	Scan(s)	Precursor mass	Adjusted precursor mass	First residue	Last residue	Proteoform sequence	Proteoform length	Proteoform E-value	Proteoform P-value	Data file name
ENSP00000304697.3	ENST00000302182.7	ENSG00000170315.13	230	123	321	R->H	148	492	8540.59	8540.57	77	152	G.MQIFVKTLTGKTITLEVEPSDTIENVKAKIQDKEGIPPDQQRLIFAGKQLEDGRTLSDYNIQKESTLHLVLHLRGG.M	76	2.05084e-24	2.05084e-24	./DLD_A_combined_ms2.msalign
ENSP00000359693.1	ENST00000370659.1	ENSG00000198225.5	109	142	344	H->Q	4	527	11812.1	11812	2	108	M.GVQVETISPGDGRTFPKRGQTCVVHYTGMLEDGKKFDSSRDRNKPFKFMLGKQEVIRGWEEGVAQMSVGQRAKLTISPDYAYGATGHPGIIPPHATLVFDVELLKLE.	107	4.02918e-25	4.02918e-25	./DLD_A_combined_ms2.msalign
ENSP00000359693.1	ENST00000370659.1	ENSG00000198225.5	109	142	344	W->G	13	527	11812.1	11812	2	108	M.GVQVETISPGDGRTFPKRGQTCVVHYTGMLEDGKKFDSSRDRNKPFKFMLGKQEVIRGWEEGVAQMSVGQRAKLTISPDYAYGATGHPGIIPPHATLVFDVELLKLE.	107	4.02918e-25	4.02918e-25	./DLD_A_combined_ms2.msalign
ENSP00000359693.1	ENST00000370659.1	ENSG00000198225.5	109	142	344	S->G	20	527	11812.1	11812	2	108	M.GVQVETISPGDGRTFPKRGQTCVVHYTGMLEDGKKFDSSRDRNKPFKFMLGKQEVIRGWEEGVAQMSVGQRAKLTISPDYAYGATGHPGIIPPHATLVFDVELLKLE.	107	4.02918e-25	4.02918e-25	./DLD_A_combined_ms2.msalign
ENSP00000359693.1	ENST00000370659.1	ENSG00000198225.5	109	142	344	M->V	25	527	11812.1	11812	2	108	M.GVQVETISPGDGRTFPKRGQTCVVHYTGMLEDGKKFDSSRDRNKPFKFMLGKQEVIRGWEEGVAQMSVGQRAKLTISPDYAYGATGHPGIIPPHATLVFDVELLKLE.	107	4.02918e-25	4.02918e-25	./DLD_A_combined_ms2.msalign
ENSP00000359693.1	ENST00000370659.1	ENSG00000198225.5	109	142	344	V->A	65	527	11812.1	11812	2	108	M.GVQVETISPGDGRTFPKRGQTCVVHYTGMLEDGKKFDSSRDRNKPFKFMLGKQEVIRGWEEGVAQMSVGQRAKLTISPDYAYGATGHPGIIPPHATLVFDVELLKLE.	107	4.02918e-25	4.02918e-25	./DLD_A_combined_ms2.msalign
ENSP00000358151.2	ENST00000369155.3	ENSG00000184678.10	127	231	462	A->T	8	712	13810.6	13810.5	2	126	M.PEPAKSTPAPKKGSKKAVTKAQKKDGKKRKRSRKESYSIYVYKVLKQVHPDTGISSKAMGIMNSFVNDIFERIAGEASRLAHYNKRSTITSREIQTAVRLLLPGELAKHAVSEGTKAVTKYTSSK.	125	1.9864e-18	1.9864e-18	./DLD_A_combined_ms2.msalign
ENSP00000339835.3	ENST00000340398.4	ENSG00000188375.4	136	423	701	L->F	104	1076	15345.6	15345.6	1	135	.(M)[Acetyl]ARTKQTARKSTGGKAPRKQLATKAARKSAPSTCGVKPHRYRPGTVALREIRRYQKSTELL(IRKLPFQRLVREIAQDFKTDLRFQSAAI)[67.1765]GALQEASEAYLVGLFEDTNLCAIHAKRVTIMPKDIQLARRIRGERA.	135	2.49769e-08	2.49769e-08	./DLD_A_combined_ms2.msalign
ENSP00000339835.3	ENST00000340398.4	ENSG00000188375.4	136	423	701	T->A	30	1076	15345.6	15345.6	1	135	.(M)[Acetyl]ARTKQTARKSTGGKAPRKQLATKAARKSAPSTCGVKPHRYRPGTVALREIRRYQKSTELL(IRKLPFQRLVREIAQDFKTDLRFQSAAI)[67.1765]GALQEASEAYLVGLFEDTNLCAIHAKRVTIMPKDIQLARRIRGERA.	135	2.49769e-08	2.49769e-08	./DLD_A_combined_ms2.msalign
ENSP00000451080.1	ENST00000557016.5	ENSG00000100632.10	105	500	810	S->G	55	1240	12132	12132	2	104	M.(S)[Acetyl]HTILLVQPTKRPEGRTYADYESVNECMEGVCKMYEEHLKRMNPNSPSITYDIGQLFDFIDDLADLSCLVYRADTQTYQPYNKDWIKEKIYVLLRRQAQQAGK.	103	6.91704e-18	6.91704e-18	./DLD_A_combined_ms2.msalign
ENSP00000367049.3	ENST00000377818.3	ENSG00000204899.5	83	646	1290	A->G	5	1960	8354.27	8354.27	2	82	M.(A)[Acetyl]SSGGAGAAAAAAAANLNAVRETMDVLLEISRILNTGLDMETLSICVRLCEQGINPEALSSVIKELRKATEALKAAENMTS.	81	8.0652e-07	8.0652e-07	./DLD_A_combined_ms2.msalign
ENSP00000322181.8	ENST00000314392.12	ENSG00000136908.17	85	713	1511	T->S	76	2291	9161.23	9161.23	2	84	M.ATGTDQVVGLGLVAVSLIIFTYYTAWVILLPFIDSQHVIHKYFLPRAYAVAIPLAAGLLLLLFVGLFISYVMLKSKRVTKKAQ.	83	1.28476e-17	1.28476e-17	./DLD_A_combined_ms2.msalign
ENSP00000256441.4	ENST00000256441.4	ENSG00000134056.11	104	807	1000249	E->G	103	377	11166.9	11166.9	1	103	.(M)[Acetyl](MGSKMASASRVV)[-262.0682]QVVKPHTPLIRFPDRRDNPKPNVSEALRSAGLPSHSSVISQHSKGSKSPDLLMYQGPPDTAEIIKTLPQKYRRKLVSQEEMEFIQRGGPG.	103	4.0877e-05	4.08761e-05	./DLD_A_combined_ms2.msalign
ENSP00000267884.6	ENST00000267884.10	ENSG00000140319.10	137	865	1000344	P->A	124	520	14403.8	14403.8	2	136	M.VLLESEQFLTELTRLFQKCRTSGSVYITLKKYDGRTKPIPKKGTVEGFEPADNKCLLRATDGKKKISTVVSSKEVNKFQMAYSNLLRANMDGLKKRDKKNKTKKTKAAAAAAAAAPAAAATAATTAATTAATAAQ.	135	1.31316e-17	1.31316e-17	./DLD_A_combined_ms2.msalign
ENSP00000341094.1	ENST00000341023.1	ENSG00000196866.2	131	988	1000515	I->V	80	781	13994.9	13994.9	2	130	M.SGRGKQGGKARAKAKTRSSRAGLQFPV(GR)[41.0404]VHRLLRKGNYSERVGAGAPVYLAAVLEYLTAEILELAGNAARDNKKTRIVPRHLQLAIRNDEELNKLLGKVTIAQGGVLPNIQAVLLPKKTESHHKAKGK.	129	3.05566e-14	3.05566e-14	./DLD_A_combined_ms2.msalign
ENSP00000475814.1	ENST00000607355.2	ENSG00000272196.2	131	991	1000518	K->E	6	785	13992.9	13992.9	2	130	M.(S)[Acetyl]GRGEQGGKARAKAKSRSSRAGLQFPVGRVHRL(LRKGNYAERVGAGAPVYM)[-5.8783]AAVLEYLTAEILELAGNAARDNKKTRIIPRHLQLAIRNDEELNKLLGKVTIAQGGVLPNIQAVLLPKKTESHHKAKGK.	129	5.22482e-20	5.22482e-20	./DLD_A_combined_ms2.msalign
ENSP00000219169.4	ENST00000219169.8	ENSG00000102898.11	128	1241	1001037	E->D	8	1566	14366	14366	2	127	M.(G)[Acetyl]DKPIWDQIGSSFIQHYYQLFDNDRTQLGAIYIDASCLTWEGQQFQGKAAIVEKLSSLPFQKIQHSITAQDHQPTPDSCIISMVVGQLKADEDPIMGFHQMFLLKNINDAWVCTNDMFRLALHNFG.	126	6.0472e-11	6.0472e-11	./DLD_A_combined_ms2.msalign
ENSP00000469228.2	ENST00000600467.6	ENSG00000105372.7	146	1470	2000374	V->F	4	567	15966.5	15966.5	2	145	M.PGFTVKDVNQQEFVRALAAFLKKSGKLKVPEWVDTVKLAKHKELAPYDENWFYTRAASTARHLYLRGGAGVGSMTKIYGGRQRNGVMPSHFSRGSKSVARRVLQALEGLKMVEKDQDGGRKLTPQGQRD(LDRIAGQVAAAN)[-0.9719]KKH.	144	4.8551e-07	4.8551e-07	./DLD_A_combined_ms2.msalign
ENSP00000434024.1	ENST00000530167.1	ENSG00000188486.3	144	1577	2000561	K->R	134	852	15074.4	15074.4	2	143	M.(S)[Acetyl]GRGKTGGKARAKAKSRSSRAGLQFPVGRVHRLLRKGHYAERVGAGAPVYLAAVLEYLTAEILELAGNAARDNKKTRIIPRHLQLAIRNDEELNKLLGGVTIAQGGVLPNIQAVLLPKKTSATVGPKAPSGGRKATQASQEY.	142	3.732e-21	3.732e-21	./DLD_A_combined_ms2.msalign
ENSP00000272067.6	ENST00000272067.10	ENSG00000143727.15	159	1605	2000612	Q->R	106	929	17904.9	17904.9	2	158	M.(A)[Acetyl]EQATKSVLFVCLGNICRSPIAEAVFRKLVTDQNISENWVIDSGAVSDWNVGRSPDPRAVSCLRNHGIHTAHKARQITKEDFATFDYILCMDESNLRDLNRKSNRVKTCKAKIELLGSYDPQKQLIIEDPYYGNDSDFETVYQQCVRCCRAFLEKAH.	157	0.00030742	0.000307396	./DLD_A_combined_ms2.msalign
ENSP00000358674.4	ENST00000369660.8	ENSG00000102178.12	158	1651	2000687	L->M	127	1041	17783.5	17783.5	1	157	.MQLTVKALQGRECSLQVPEDELVSTLKQLVSEKLNVPVRQQRLLFKGKALADGKRLSDYSIGPNSKLNLVVKPLEKVLLEEGEAQRLADSPPPQVWQLISKVLARHFSAADASRVLEQLQRDYERSMSRLTLDDIERLASRFLHPEVTETMEKGFSK.	157	1.00152e-06	1.00152e-06	./DLD_A_combined_ms2.msalign
ENSP00000368699.4	ENST00000379389.4	ENSG00000187608.8	166	1677	2000726	S->N	83	1100	17031	17031	2	157	M.GWDLTVKMLAGNEFQVSLSSSMSVSELKAQITQKIGVHAFQQRLAVHPSGVALQDRVPLASQGLGPGSTVLLVVDKCDEPLNILVRNNKGRSSTYEVRLTQTVAHLKQQVSGLEGVQDDLFWLTFEGKPLEDQLPLGEYGLKPLSTVFMNLRLRGG.G	156	3.3171e-24	3.3171e-24	./DLD_A_combined_ms2.msalign
ENSP00000484841.1	ENST00000621411.1	ENSG00000274267.1	137	1731	2000823	S->C	87	1245	15349.5	15349.5	1	136	.(M)[Acetyl]ARTKQTARKSTGGKAPRKQLATKAARKSAPATGGVKKPHRYRPGTVALREIRRYQK(STE)[-102.9696]LLIRKLPFQRLVREIAQDFKTDLRFQCSAVMALQEACEAYLVGLFEDTNLCAIHAKRVTIMPKDIQLARRIRGERA.	136	1.37474e-06	1.37474e-06	./DLD_A_combined_ms2.msalign
ENSP00000355124.3	ENST00000361566.7	ENSG00000171345.13	401	1775	2000888	P->T	241	1343	18377.2	18377.2	241	400	A.TGTDLAKILSDMRSQYEVMAEQNRKDAEAWFTSRTEELNREVAGHTEQLQMSRSEV(TD)[157.0938]LRRTLQGLEIELQSQLSMKAALEDTLAETEARFGAQLAHIQALISGIEAQLGDVRADSERQNQEYQRLMDIKSRLEQEIATYRSLLEGQEDHYNNLSASKVL.	160	0.129709	0.121661	./DLD_A_combined_ms2.msalign
ENSP00000360473.2	ENST00000371419.6	ENSG00000101132.9	135	1843	2001122	F->L	17	1694	15181.6	15181.6	2	134	M.(A)[Acetyl]ATMKKAAAEDVNVTLEDQQKINKFARNTSRITELKEEIEVKKKQLQNLEDACDDIMLADDDCLMIPYQIGDVFISHSQEETQEMLEEAKKNLQEEIDALESRVESIQRVLADLKVQLYAKFGSNINLEADES.	133	4.77256e-07	4.77256e-07	./DLD_A_combined_ms2.msalign
ENSP00000328973.4	ENST00000329563.8	ENSG00000100300.17	170	1891	2001353	T->A	147	2040	18654.6	18654.6	2	169	M.APPWVPAMGFTLAPSLGCFVGSRFVHGEGLRWYAGLQKPSWHPPHWVLGPVWGTLYSAMGYGSYLVWKELGGFTEKAVVPLGLYTGQLALNWAWPPIFFGARQMGWALVDLLLVSGAAAATTVAWYQVSPLAARLLYPYLAWLAFATTLNYCVWRDNHGWRGGRRLPE.	168	3.24336e-15	3.24336e-15	./DLD_A_combined_ms2.msalign
ENSP00000262061.2	ENST00000262061.6	ENSG00000111481.9	178	1898	2001364	R->W	54	2057	20257.5	20257.5	1	177	.(M)[Acetyl]EALILEPSLYTVKAILILDNDGDRLFAKYYDDTYPSVKEQKAFEKNIFNKTHWTDSEIALLEGLTVVYKSSIDLYFYVIGSSYENELMLMAVLNCLFDSLSQMLRKNVEKRALLENMEGLFLAVDEIVDGGVILESDPQQVVHRVALRGEDVPLTEQTVSQVLQSAKEQIKWSLLR.	177	2.9864e-25	2.9864e-25	./DLD_A_combined_ms2.msalign
ENSP00000265260.3	ENST00000265260.7	ENSG00000081154.11	179	2028	3000254	S->F	87	389	13788.9	13788.9	2	135	M.(A)[Acetyl]DGKAGDEKPEKSQRAGAAGGPEEEAEKPVKTKTVSSSNGGESSSRSAEKRSAEEEAADLPTKPTKISKFGFAIGSQTTKKASAIFIKLGSSKPKETVPTLAPKTLSVAAAFNEDED(SEP)[-311.2291]EEMPPEAKMRMKNI.G	134	0.0230046	0.022742	./DLD_A_combined_ms2.msalign
ENSP00000370579.1	ENST00000381184.6	ENSG00000002586.19	178	2262	3000691	V->F	134	1045	16221.3	16221.1	1	161	.(M)[Acetyl]ARGAALALLLFGLLGVLVAAPDGGFDLSDALPDNENKKPTAIPKKPSAGDDFDLGDAVVDGENDDPRPPNPPKPMPNPNPNHPSSSGSFSDADLADGVSGGEGKGGSDGGGSHRKEGEEADAPGVIPGIVGAFVVAVAGAISSFIAYQKKKLCFKENGQL.A	161	0.0892272	0.085366	./DLD_A_combined_ms2.msalign
ENSP00000253023.2	ENST00000253023.7	ENSG00000130725.7	184	2293	3000748	G->D	171	1131	20986.7	20986.7	1	183	.(M)[Acetyl]IKLFSLKQQKKEEESAGGTKGSSKKASAAQLRIQKDINELNLPKTCDISFSDPDDLLNFKLVICPDEGFYKSGKFVFSFKVGQGYPHDPPKVKCETMVYHPNIDLEGNVCLNILREDWKPVLTINSIIYGLQYLFLEPNPEDPLNKEAAEVLQNNRRLFEQNVQRSMRGDYIGSTYFERCLK.	183	4.30794e-08	4.30794e-08	./DLD_A_combined_ms2.msalign
ENSP00000400175.1	ENST00000418115.5	ENSG00000067560.10	194	2347	3000851	S->I	88	1285	21651.1	21651.1	2	193	M.(A)[Acetyl]AIRKKLVIVGDGACGKTCLLIVFSKDQFPEVYVPTVFENYVADIEVDGKQVELALWDTAGQEDYDRLRPLSYPDTDVILMCFSIDIPDSLENIPEKWTPEVKHFCPNVPIILVGNKKDLRNDEHTRRELAKMKQE(PVKPEEGRDMANRIGA)[-39.9552]FGYMECSAKTKDGVREVFEMATRAALQARRGKKKSGCLVL.	192	0.00190441	0.0019026	./DLD_A_combined_ms2.msalign
ENSP00000335636.4	ENST00000334982.8	ENSG00000173418.11	179	2447	3001110	Y->H	137	1674	20240.1	20240.1	2	178	M.(T)[Acetyl]TLRAFTCDDLFRFNNINLDPLTETYGIPFYLQYLAHWPEYFIVAEAPGGELMGYIMGKAEGSVAREEWHGHVTALSVAPEFRRLGLAAKLMELLEEISERKGGFFVDLFVRVSNQVAVNMYKQLGYSVYRTVIEHYSASNGEPDEDAYDMRKALSRDTEKKSIIPLPHPVRPEDIE.	177	0.191804	0.178449	./DLD_A_combined_ms2.msalign
ENSP00000493902.1	ENST00000645668.1	ENSG00000198860.12	172	2476	3001197	G->D	19	1804	18738.2	18738.2	1	171	.(M)[Acetyl]EERGDSEPTPGCSGLGPDGVRGFGDGGGAPSWAPEDAWMGTHPKYLEMMELDIGDATHVYVAFLVYLDLMESKSWHEVNCVGLPELQLICLVGTEIEGEGLQTVVPTPITASLSHNRIREILKASRKLQGDPDLPMSFTLAIVESDSTIVYYKLTDGFMLPDPQNISLRR.	171	3.33644e-05	3.3364e-05	./DLD_A_combined_ms2.msalign
ENSP00000493902.1	ENST00000645668.1	ENSG00000198860.12	172	2476	3001197	Q->H	59	1804	18738.2	18738.2	1	171	.(M)[Acetyl]EERGDSEPTPGCSGLGPDGVRGFGDGGGAPSWAPEDAWMGTHPKYLEMMELDIGDATHVYVAFLVYLDLMESKSWHEVNCVGLPELQLICLVGTEIEGEGLQTVVPTPITASLSHNRIREILKASRKLQGDPDLPMSFTLAIVESDSTIVYYKLTDGFMLPDPQNISLRR.	171	3.33644e-05	3.3364e-05	./DLD_A_combined_ms2.msalign
ENSP00000219204.3	ENST00000219204.7	ENSG00000102931.7	164	2488	3001290	E->K	87	1944	18851.1	18851.2	1	163	.(M)[Acetyl]DALEGESFALSFSSASDAEFDAVVGYLEDIIMDDEFQLLQRNFMDKYYLEFEDTEENKLIYTPIFNEYISLVEKYIEEQLLQRIPKFNMAAFTTTLQHHKDEVAGDIFDMLLTFTDFLAFKEMFLDYRAEKEGRGLDLSSGLVVTSLCKSSSLPASQNNLRH.	163	9.1423e-09	9.1423e-09	./DLD_A_combined_ms2.msalign
ENSP00000419475.1	ENST00000473414.5	ENSG00000114744.8	200	2493	3001321	L->F	173	1990	22765.1	22765.1	1	199	.MLLELSEEHKEHLAFLPQVDSAVVAEFGRIAVEFLRRGANPKIYEGAARKLNVSSDTVQHGVEGLTYLLTESSKLMISELDFQDSVFVLGFSEELNKLLLQLYLDNRKEIRTILSELAPSLPSYHNLEWRLDVQLASRSLRQQIKPAVTIKLHLNQNGDHNTKVLQTDPATLFHLVQQLEQALEEMKTNHCRRVVRNIK.	199	0.088776	0.0858643	./DLD_A_combined_ms2.msalign
ENSP00000254301.9	ENST00000254301.13	ENSG00000131981.15	251	2743	4000498	P->H	64	755	26083.1	26083	2	250	M.(A)[Acetyl]DNFSLHDALSGSGNPNPQGWPGAWGNQPAGAGGYPGASYPGAYPGQAPPGAYPGQAPPGAYHGAPGAYPGAPAPGVYPGPPSGPGAYPSSGQPSAPGAYPATGPYGAPAGPLIVPYNLPLPGGVVPRMLITILGTVKPNANRIALDFQRGNDVAFHFNPRFNENNRRVIVCNTKLDNNWGREERQSVFPFESGKPFKIQVLVEPDHFKVAVNDAHLLQYNHRVKKLNEISKLGISGDIDLTSASYTMI.	249	1.36504e-15	1.36504e-15	./DLD_A_combined_ms2.msalign
ENSP00000254301.9	ENST00000254301.13	ENSG00000131981.15	251	2743	4000498	T->P	98	755	26083.1	26083	2	250	M.(A)[Acetyl]DNFSLHDALSGSGNPNPQGWPGAWGNQPAGAGGYPGASYPGAYPGQAPPGAYPGQAPPGAYHGAPGAYPGAPAPGVYPGPPSGPGAYPSSGQPSAPGAYPATGPYGAPAGPLIVPYNLPLPGGVVPRMLITILGTVKPNANRIALDFQRGNDVAFHFNPRFNENNRRVIVCNTKLDNNWGREERQSVFPFESGKPFKIQVLVEPDHFKVAVNDAHLLQYNHRVKKLNEISKLGISGDIDLTSASYTMI.	249	1.36504e-15	1.36504e-15	./DLD_A_combined_ms2.msalign
ENSP00000376176.2	ENST00000392369.6	ENSG00000132341.11	217	2779	4000566	N->S	156	857	24291.7	24291.6	2	216	M.(A)[Acetyl]AQGEPQVQFKLVLVGDGGTGKTTFVKRHLTGEFEKKYVATLGVEVHPLVFHTNRGPIKFNVWDTAGQEKFGGLRDGYYIQAQCAIIMFDVTSRVTYKNVPNWHRDLVRVCENIPIVLCGNKVDIKDRKVKAKSIVFHRKKNLQYYDISAKSNYSFEKPFLWLARKLIGDPNLEFVAMPALAPPEVVMDPALAAQYEHDLEVAQTTALPDEDDDL.	215	1.45576e-05	1.45575e-05	./DLD_A_combined_ms2.msalign
ENSP00000368390.4	ENST00000379096.9	ENSG00000076554.15	185	2848	4000839	A->T	59	1267	19892.3	19892.2	1	184	.(M)[Acetyl]DRGEQGLLRTDPVPEEGEDVA(ATISATET)[-30.9959]LSEEEQEELRRELAKVEEEIQTLSQVLATKEKHLAEIKRKLGINSLQELKQNIAKGWQDVTATSAYKKTSETLSQAGQKASAAFSSVGSVITKKLEDVKNSPTFKSFEEKVENLKSKVGGTKPAGGDFGEVLNSAANASATTTEPLPEKTQESL.	184	4.57207e-08	4.57207e-08	./DLD_A_combined_ms2.msalign
ENSP00000379933.4	ENST00000396705.9	ENSG00000111669.14	250	2850	4000841	P->L	179	1270	26520.7	26520.7	2	249	M.APSRKFFVGGNWKMNGRKQSLGELIGTLNAAKVPADTEVVCAPPTAYIDFARQKLDPKIAVAAQNCYKVTNGAFTGEISPGMIKDCGATWVVLGHSERRHVFGESDELIGQKVA(HALAEGL)[-17.0185]GVIACIGEKLDEREAGITEKVVFEQTKVIADNVKDWSKVVLAYEPVWAIGTGKTATLQQAQEVHEKLRGWLKSNVSDAVAQSTRIIYGGSVTGATCKELASQPDVDGFLVGGASLKPEFVDIINAKQ.	248	1.07754e-07	1.07754e-07	./DLD_A_combined_ms2.msalign
ENSP00000357535.3	ENST00000368547.3	ENSG00000127884.4	291	2915	4001231	T->I	75	1855	28336.5	28336.5	28	290	F.ASGANFEYIIAEKRGKNNTVGLIQLNRPKALNALCDGLIDELNQALKIFEEDPAVGAIVLTGGDKAFAAGADIKEMQNLSFQDCYSSKFLKHWDHLTQVKKPVIAAVNGYAFGGGCELAMMCDIIYAGEKAQFAQPEILIGTIPGAGGTQRLTRAVGKSLAMEMVLTGDRISAQDAKQAGLVSKICPVETLVEEAIQCAEKIASNSKIVVAMAKESVNAAFEMTLTEGSKLEKKLFYSTFATDDRKEGMTAFVEKRKANFKDQ.	263	1.46355e-10	1.46355e-10	./DLD_A_combined_ms2.msalign
ENSP00000221233.3	ENST00000221233.8	ENSG00000077348.8	236	2963	4001504	T->M	5	2264	25304.9	25304.9	1	235	.(M)[Acetyl]EEEMHTDAKIRAENGTGSSPRGPGCSLRHFACEQNLLSRPDGSASFLQGDTSVLAGVYGPAEVKVSKEIFNKATLEVILRPKIGLPGVAEKSRERLIRNTCEAVVLGTLHPRTSITVVLQVVSDAGSLLACCLNAACMALVDAGVPMRALFCGVACALDSDGTLVLDPTSKQEKEARAVLTFALDSVERKLLMSSTKGLYSDTELQQCLAAAQAASQHVFRFYRESLQRRYSKS.	235	0.000578274	0.000578135	./DLD_A_combined_ms2.msalign

## Sheet: COMP-M
The proteoforms covering SNV sites confidently identified from COMP-M database
Protein ID	Transcript ID	Gene ID	Protein length	Prsm ID	Spectrum ID	Amino acid change	Position	Scan(s)	Precursor mass	Adjusted precursor mass	First residue	Last residue	Proteoform sequence	Proteoform length	Proteoform E-value	Data file name
ENSP00000304697.3	ENST00000302182.7	ENSG00000170315.13	230	121	321	R->H	148	492	8540.59	8540.57	77	152	G.MQIFVKTLTGKTITLEVEPSDTIENVKAKIQDKEGIPPDQQRLIFAGKQLEDGRTLSDYNIQKESTLHLVLHLRGG.M	76	2.20089e-24	./DLD_A_combined_ms2.msalign
ENSP00000359693.1	ENST00000370659.1	ENSG00000198225.5	109	140	344	H->Q	4	527	11812.1	11812	2	108	M.GVQVETISPGDGRTFPKRGQTCVVHYTGMLEDGKKFDSSRDRNKPFKFMLGKQEVIRGWEEGVAQMSVGQRAKLTISPDYAYGATGHPGIIPPHATLVFDVELLKLE.	107	6.5277e-25	./DLD_A_combined_ms2.msalign
ENSP00000359693.1	ENST00000370659.1	ENSG00000198225.5	109	140	344	W->G	13	527	11812.1	11812	2	108	M.GVQVETISPGDGRTFPKRGQTCVVHYTGMLEDGKKFDSSRDRNKPFKFMLGKQEVIRGWEEGVAQMSVGQRAKLTISPDYAYGATGHPGIIPPHATLVFDVELLKLE.	107	6.5277e-25	./DLD_A_combined_ms2.msalign
ENSP00000359693.1	ENST00000370659.1	ENSG00000198225.5	109	140	344	S->G	20	527	11812.1	11812	2	108	M.GVQVETISPGDGRTFPKRGQTCVVHYTGMLEDGKKFDSSRDRNKPFKFMLGKQEVIRGWEEGVAQMSVGQRAKLTISPDYAYGATGHPGIIPPHATLVFDVELLKLE.	107	6.5277e-25	./DLD_A_combined_ms2.msalign
ENSP00000359693.1	ENST00000370659.1	ENSG00000198225.5	109	140	344	M->V	25	527	11812.1	11812	2	108	M.GVQVETISPGDGRTFPKRGQTCVVHYTGMLEDGKKFDSSRDRNKPFKFMLGKQEVIRGWEEGVAQMSVGQRAKLTISPDYAYGATGHPGIIPPHATLVFDVELLKLE.	107	6.5277e-25	./DLD_A_combined_ms2.msalign
ENSP00000359693.1	ENST00000370659.1	ENSG00000198225.5	109	140	344	V->A	65	527	11812.1	11812	2	108	M.GVQVETISPGDGRTFPKRGQTCVVHYTGMLEDGKKFDSSRDRNKPFKFMLGKQEVIRGWEEGVAQMSVGQRAKLTISPDYAYGATGHPGIIPPHATLVFDVELLKLE.	107	6.5277e-25	./DLD_A_combined_ms2.msalign
ENSP00000358151.2	ENST00000369155.3	ENSG00000184678.10	127	228	462	A->T	8	712	13810.6	13810.5	2	126	M.PEPAKSTPAPKKGSKKAVTKAQKKDGKKRKRSRKESYSIYVYKVLKQVHPDTGISSKAMGIMNSFVNDIFERIAGEASRLAHYNKRSTITSREIQTAVRLLLPGELAKHAVSEGTKAVTKYTSSK.	125	1.6168e-18	./DLD_A_combined_ms2.msalign
ENSP00000339835.3	ENST00000340398.4	ENSG00000188375.4	136	419	701	L->F	104	1076	15345.6	15345.6	1	135	.(M)[Acetyl]ARTKQTARKSTGGKAPRKQLATKAARKSAPSTCGVKPHRYRPGTVALREIRRYQKSTELL(IRKLPFQRLVREIAQDFKTDLRFQSAAI)[67.1765]GALQEASEAYLVGLFEDTNLCAIHAKRVTIMPKDIQLARRIRGERA.	135	6.11898e-08	./DLD_A_combined_ms2.msalign
ENSP00000339835.3	ENST00000340398.4	ENSG00000188375.4	136	419	701	T->A	30	1076	15345.6	15345.6	1	135	.(M)[Acetyl]ARTKQTARKSTGGKAPRKQLATKAARKSAPSTCGVKPHRYRPGTVALREIRRYQKSTELL(IRKLPFQRLVREIAQDFKTDLRFQSAAI)[67.1765]GALQEASEAYLVGLFEDTNLCAIHAKRVTIMPKDIQLARRIRGERA.	135	6.11898e-08	./DLD_A_combined_ms2.msalign
ENSP00000451080.1	ENST00000557016.5	ENSG00000100632.10	105	494	810	S->G	55	1240	12132	12132	2	104	M.(S)[Acetyl]HTILLVQPTKRPEGRTYADYESVNECMEGVCKMYEEHLKRMNPNSPSITYDIGQLFDFIDDLADLSCLVYRADTQTYQPYNKDWIKEKIYVLLRRQAQQAGK.	103	8.6712e-18	./DLD_A_combined_ms2.msalign
ENSP00000367049.3	ENST00000377818.3	ENSG00000204899.5	83	631	1290	A->G	5	1960	8354.27	8354.27	2	82	M.(A)[Acetyl]SSGGAGAAAAAAAANLNAVRETMDVLLEISRILNTGLDMETLSICVRLCEQGINPEALSSVIKELRKATEALKAAENMTS.	81	2.41062e-06	./DLD_A_combined_ms2.msalign
ENSP00000322181.8	ENST00000314392.12	ENSG00000136908.17	85	698	1511	T->S	76	2291	9161.23	9161.23	2	84	M.ATGTDQVVGLGLVAVSLIIFTYYTAWVILLPFIDSQHVIHKYFLPRAYAVAIPLAAGLLLLLFVGLFISYVMLKSKRVTKKAQ.	83	1.3236e-17	./DLD_A_combined_ms2.msalign
ENSP00000256441.4	ENST00000256441.4	ENSG00000134056.11	104	791	1000249	E->G	103	377	11166.9	11166.9	1	103	.(M)[Acetyl](MGSKMASASRVV)[-262.0682]QVVKPHTPLIRFPDRRDNPKPNVSEALRSAGLPSHSSVISQHSKGSKSPDLLMYQGPPDTAEIIKTLPQKYRRKLVSQEEMEFIQRGGPG.	103	0.000110936	./DLD_A_combined_ms2.msalign
ENSP00000267884.6	ENST00000267884.10	ENSG00000140319.10	137	848	1000344	P->A	124	520	14403.8	14403.8	2	136	M.VLLESEQFLTELTRLFQKCRTSGSVYITLKKYDGRTKPIPKKGTVEGFEPADNKCLLRATDGKKKISTVVSSKEVNKFQMAYSNLLRANMDGLKKRDKKNKTKKTKAAAAAAAAAPAAAATAATTAATTAATAAQ.	135	2.63244e-17	./DLD_A_combined_ms2.msalign
ENSP00000341094.1	ENST00000341023.1	ENSG00000196866.2	131	967	1000515	I->V	80	781	13994.9	13994.9	2	130	M.SGRGKQGGKARAKAKTRSSRAGLQFPV(GR)[41.0404]VHRLLRKGNYSERVGAGAPVYLAAVLEYLTAEILELAGNAARDNKKTRIVPRHLQLAIRNDEELNKLLGKVTIAQGGVLPNIQAVLLPKKTESHHKAKGK.	129	7.4236e-14	./DLD_A_combined_ms2.msalign
ENSP00000434024.1	ENST00000530167.1	ENSG00000188486.3	144	1014	1000574	K->R	134	870	15153.3	15153.4	1	143	.MSGRGKTGGKARAKAKSRSSRAGLQFPVGRVHRLLRKG(HYAERVGAGAP)[-9.9734]VYLAAVLEYLTAEILELAGNAARDNKKTRIIPRHLQLAIRNDEELNKLLGGVTIAQGGVLPNIQAVLLPKKTSATVGPKAPSGGRKATQASQEY.	143	4.37155e-06	./DLD_A_combined_ms2.msalign
ENSP00000219169.4	ENST00000219169.8	ENSG00000102898.11	128	1216	1001037	E->D	8	1566	14366	14366	2	127	M.(G)[Acetyl]DKPIWDQIGSSFIQHYYQLFDNDRTQLGAIYIDASCLTWEGQQFQGKAAIVEKLSSLPFQKIQHSITAQDHQPTPDSCIISMVVGQLKADEDPIMGFHQMFLLKNINDAWVCTNDMFRLALHNFG.	126	6.11072e-11	./DLD_A_combined_ms2.msalign
ENSP00000469228.2	ENST00000600467.6	ENSG00000105372.7	146	1435	2000374	V->F	4	567	15966.5	15966.5	2	145	M.PGFTVKDVNQQEFVRALAAFLKKSGKLKVPEWVDTVKLAKHKELAPYDENWFYTRAASTARHLYLRGGAGVGSMTKIYGGRQRNGVMPSHFSRGSKSVARRVLQALEGLKMVEKDQDGGRKLTPQGQRD(LDRIAGQVAAAN)[-0.9719]KKH.	144	1.25375e-06	./DLD_A_combined_ms2.msalign
ENSP00000475814.1	ENST00000607355.2	ENSG00000272196.2	131	1515	2000525	K->E	6	796	13993	13992.9	2	130	M.SGRGEQGGKARAKAKSRSSRAGLQFPVGRVHRLLRKGNYAERVGA(GAPVYMA)[36.1301]AVLEYLTAEILELAGNAARDNKKTRIIPRHLQLAIRNDEELNKLLGKVTIAQGGVLPNIQAVLLPKKTESHHKAKGK.	129	4.10473e-16	./DLD_A_combined_ms2.msalign
ENSP00000364310.1	ENST00000375167.1	ENSG00000188486.3	144	1539	2000561	K->R	134	852	15074.4	15074.4	2	143	M.(S)[Acetyl]GRGKTGGKARAKAKSRSSRAGLQFPVGRVHRLLRKGHYAERVGAGAPVYLAAVLEYLTAEILELAGNAARDNKKTRIIPRHLQLAIRNDEELNKLLGGVTIAQGGVLPNIQAVLLPKKTSATVGPKAPSGGRKATQASQEY.	142	2.66126e-20	./DLD_A_combined_ms2.msalign
ENSP00000272067.6	ENST00000272067.10	ENSG00000143727.15	159	1566	2000612	Q->R	106	929	17904.9	17904.9	2	158	M.(A)[Acetyl]EQATKSVLFVCLGNICRSPIAEAVFRKLVTDQNISENWVIDSGAVSDWNVGRSPDPRAVSCLRNHGIHTAHKARQITKEDFATFDYILCMDESNLRDLNRKSNRVKTCKAKIELLGSYDPQKQLIIEDPYYGNDSDFETVYQQCVRCCRAFLEKAH.	157	0.00092166	./DLD_A_combined_ms2.msalign
ENSP00000358674.4	ENST00000369660.8	ENSG00000102178.12	158	1612	2000687	L->M	127	1041	17783.5	17783.5	1	157	.MQLTVKALQGRECSLQVPEDELVSTLKQLVSEKLNVPVRQQRLLFKGKALADGKRLSDYSIGPNSKLNLVVKPLEKVLLEEGEAQRLADSPPPQVWQLISKVLARHFSAADASRVLEQLQRDYERSMSRLTLDDIERLASRFLHPEVTETMEKGFSK.	157	2.02648e-06	./DLD_A_combined_ms2.msalign
ENSP00000368699.4	ENST00000379389.4	ENSG00000187608.8	166	1636	2000726	S->N	83	1100	17031	17031	2	157	M.GWDLTVKMLAGNEFQVSLSSSMSVSELKAQITQKIGVHAFQQRLAVHPSGVALQDRVPLASQGLGPGSTVLLVVDKCDEPLNILVRNNKGRSSTYEVRLTQTVAHLKQQVSGLEGVQDDLFWLTFEGKPLEDQLPLGEYGLKPLSTVFMNLRLRGG.G	156	4.00183e-24	./DLD_A_combined_ms2.msalign
ENSP00000484841.1	ENST00000621411.1	ENSG00000274267.1	137	1688	2000823	S->C	87	1245	15349.5	15349.5	1	136	.(M)[Acetyl]ARTKQTARKSTGGKAPRKQLATKAARKSAPATGGVKKPHRYRPGTVALREIRRYQK(STE)[-102.9696]LLIRKLPFQRLVREIAQDFKTDLRFQCSAVMALQEACEAYLVGLFEDTNLCAIHAKRVTIMPKDIQLARRIRGERA.	136	3.3802e-06	./DLD_A_combined_ms2.msalign
ENSP00000355124.3	ENST00000361566.7	ENSG00000171345.13	401	1728	2000888	P->T	241	1343	18377.2	18377.2	241	400	A.TGTDLAKILSDMRSQYEVMAEQNRKDAEAWFTSRTEELNREVAGHTEQLQMSRSEV(TD)[157.0938]LRRTLQGLEIELQSQLSMKAALEDTLAETEARFGAQLAHIQALISGIEAQLGDVRADSERQNQEYQRLMDIKSRLEQEIATYRSLLEGQEDHYNNLSASKVL.	160	0.150964	./DLD_A_combined_ms2.msalign
ENSP00000360473.2	ENST00000371419.6	ENSG00000101132.9	135	1791	2001122	F->L	17	1694	15181.6	15181.6	2	134	M.(A)[Acetyl]ATMKKAAAEDVNVTLEDQQKINKFARNTSRITELKEEIEVKKKQLQNLEDACDDIMLADDDCLMIPYQIGDVFISHSQEETQEMLEEAKKNLQEEIDALESRVESIQRVLADLKVQLYAKFGSNINLEADES.	133	6.0388e-07	./DLD_A_combined_ms2.msalign
ENSP00000328973.4	ENST00000329563.8	ENSG00000100300.17	170	1838	2001353	T->A	147	2040	18654.6	18654.6	2	169	M.APPWVPAMGFTLAPSLGCFVGSRFVHGEGLRWYAGLQKPSWHPPHWVLGPVWGTLYSAMGYGSYLVWKELGGFTEKAVVPLGLYTGQLALNWAWPPIFFGARQMGWALVDLLLVSGAAAATTVAWYQVSPLAARLLYPYLAWLAFATTLNYCVWRDNHGWRGGRRLPE.	168	5.77682e-15	./DLD_A_combined_ms2.msalign
ENSP00000262061.2	ENST00000262061.6	ENSG00000111481.9	178	1845	2001364	R->W	54	2057	20257.5	20257.5	1	177	.(M)[Acetyl]EALILEPSLYTVKAILILDNDGDRLFAKYYDDTYPSVKEQKAFEKNIFNKTHWTDSEIALLEGLTVVYKSSIDLYFYVIGSSYENELMLMAVLNCLFDSLSQMLRKNVEKRALLENMEGLFLAVDEIVDGGVILESDPQQVVHRVALRGEDVPLTEQTVSQVLQSAKEQIKWSLLR.	177	3.0128e-25	./DLD_A_combined_ms2.msalign
ENSP00000265260.3	ENST00000265260.7	ENSG00000081154.11	179	1972	3000254	S->F	87	389	13788.9	13788.9	2	135	M.(A)[Acetyl]DGKAGDEKPEKSQRAGAAGGPEEEAEKPVKTKTVSSSNGGESSSRSAEKRSAEEEAADLPTKPTKISKFGFAIGSQTTKKASAIFIKLGSSKPKETVPTLAPKTLSVAAAFNEDED(SEP)[-311.2291]EEMPPEAKMRMKNI.G	134	0.0283392	./DLD_A_combined_ms2.msalign
ENSP00000370579.1	ENST00000381184.6	ENSG00000002586.19	178	2199	3000691	V->F	134	1045	16221.3	16221.1	1	161	.(M)[Acetyl]ARGAALALLLFGLLGVLVAAPDGGFDLSDALPDNENKKPTAIPKKPSAGDDFDLGDAVVDGENDDPRPPNPPKPMPNPNPNHPSSSGSFSDADLADGVSGGEGKGGSDGGGSHRKEGEEADAPGVIPGIVGAFVVAVAGAISSFIAYQKKKLCFKENGQL.A	161	0.107386	./DLD_A_combined_ms2.msalign
ENSP00000253023.2	ENST00000253023.7	ENSG00000130725.7	184	2230	3000748	G->D	171	1131	20986.7	20986.7	1	183	.(M)[Acetyl]IKLFSLKQQKKEEESAGGTKGSSKKASAAQLRIQKDINELNLPKTCDISFSDPDDLLNFKLVICPDEGFYKSGKFVFSFKVGQGYPHDPPKVKCETMVYHPNIDLEGNVCLNILREDWKPVLTINSIIYGLQYLFLEPNPEDPLNKEAAEVLQNNRRLFEQNVQRSMRGDYIGSTYFERCLK.	183	7.2143e-08	./DLD_A_combined_ms2.msalign
ENSP00000400175.1	ENST00000418115.5	ENSG00000067560.10	194	2283	3000851	S->I	88	1285	21651.1	21651.1	2	193	M.(A)[Acetyl]AIRKKLVIVGDGACGKTCLLIVFSKDQFPEVYVPTVFENYVADIEVDGKQVELALWDTAGQEDYDRLRPLSYPDTDVILMCFSIDIPDSLENIPEKWTPEVKHFCPNVPIILVGNKKDLRNDEHTRRELAKMKQE(PVKPEEGRDMANRIGA)[-39.9552]FGYMECSAKTKDGVREVFEMATRAALQARRGKKKSGCLVL.	192	0.00316788	./DLD_A_combined_ms2.msalign
ENSP00000493902.1	ENST00000645668.1	ENSG00000198860.12	172	2411	3001197	G->D	19	1804	18738.2	18738.2	1	171	.(M)[Acetyl]EERGDSEPTPGCSGLGPDGVRGFGDGGGAPSWAPEDAWMGTHPKYLEMMELDIGDATHVYVAFLVYLDLMESKSWHEVNCVGLPELQLICLVGTEIEGEGLQTVVPTPITASLSHNRIREILKASRKLQGDPDLPMSFTLAIVESDSTIVYYKLTDGFMLPDPQNISLRR.	171	6.63464e-05	./DLD_A_combined_ms2.msalign
ENSP00000493902.1	ENST00000645668.1	ENSG00000198860.12	172	2411	3001197	Q->H	59	1804	18738.2	18738.2	1	171	.(M)[Acetyl]EERGDSEPTPGCSGLGPDGVRGFGDGGGAPSWAPEDAWMGTHPKYLEMMELDIGDATHVYVAFLVYLDLMESKSWHEVNCVGLPELQLICLVGTEIEGEGLQTVVPTPITASLSHNRIREILKASRKLQGDPDLPMSFTLAIVESDSTIVYYKLTDGFMLPDPQNISLRR.	171	6.63464e-05	./DLD_A_combined_ms2.msalign
ENSP00000219204.3	ENST00000219204.7	ENSG00000102931.7	164	2423	3001290	E->K	87	1944	18851.1	18851.2	1	163	.(M)[Acetyl]DALEGESFALSFSSASDAEFDAVVGYLEDIIMDDEFQLLQRNFMDKYYLEFEDTEENKLIYTPIFNEYISLVEKYIEEQLLQRIPKFNMAAFTTTLQHHKDEVAGDIFDMLLTFTDFLAFKEMFLDYRAEKEGRGLDLSSGLVVTSLCKSSSLPASQNNLRH.	163	5.51094e-09	./DLD_A_combined_ms2.msalign
ENSP00000419475.1	ENST00000473414.5	ENSG00000114744.8	200	2427	3001321	L->F	173	1990	22765.1	22765.1	1	199	.MLLELSEEHKEHLAFLPQVDSAVVAEFGRIAVEFLRRGANPKIYEGAARKLNVSSDTVQHGVEGLTYLLTESSKLMISELDFQDSVFVLGFSEELNKLLLQLYLDNRKEIRTILSELAPSLPSYHNLEWRLDVQLASRSLRQQIKPAVTIKLHLNQNGDHNTKVLQTDPATLFHLVQQLEQALEEMKTNHCRRVVRNIK.	199	0.312928	./DLD_A_combined_ms2.msalign
ENSP00000254301.9	ENST00000254301.13	ENSG00000131981.15	251	2667	4000498	P->H	64	755	26083.1	26083	2	250	M.(A)[Acetyl]DNFSLHDALSGSGNPNPQGWPGAWGNQPAGAGGYPGASYPGAYPGQAPPGAYPGQAPPGAYHGAPGAYPGAPAPGVYPGPPSGPGAYPSSGQPSAPGAYPATGPYGAPAGPLIVPYNLPLPGGVVPRMLITILGTVKPNANRIALDFQRGNDVAFHFNPRFNENNRRVIVCNTKLDNNWGREERQSVFPFESGKPFKIQVLVEPDHFKVAVNDAHLLQYNHRVKKLNEISKLGISGDIDLTSASYTMI.	249	1.7132e-15	./DLD_A_combined_ms2.msalign
ENSP00000254301.9	ENST00000254301.13	ENSG00000131981.15	251	2667	4000498	T->P	98	755	26083.1	26083	2	250	M.(A)[Acetyl]DNFSLHDALSGSGNPNPQGWPGAWGNQPAGAGGYPGASYPGAYPGQAPPGAYPGQAPPGAYHGAPGAYPGAPAPGVYPGPPSGPGAYPSSGQPSAPGAYPATGPYGAPAGPLIVPYNLPLPGGVVPRMLITILGTVKPNANRIALDFQRGNDVAFHFNPRFNENNRRVIVCNTKLDNNWGREERQSVFPFESGKPFKIQVLVEPDHFKVAVNDAHLLQYNHRVKKLNEISKLGISGDIDLTSASYTMI.	249	1.7132e-15	./DLD_A_combined_ms2.msalign
ENSP00000376176.2	ENST00000392369.6	ENSG00000132341.11	217	2701	4000566	N->S	156	857	24291.7	24291.6	2	216	M.(A)[Acetyl]AQGEPQVQFKLVLVGDGGTGKTTFVKRHLTGEFEKKYVATLGVEVHPLVFHTNRGPIKFNVWDTAGQEKFGGLRDGYYIQAQCAIIMFDVTSRVTYKNVPNWHRDLVRVCENIPIVLCGNKVDIKDRKVKAKSIVFHRKKNLQYYDISAKSNYSFEKPFLWLARKLIGDPNLEFVAMPALAPPEVVMDPALAAQYEHDLEVAQTTALPDEDDDL.	215	2.19684e-05	./DLD_A_combined_ms2.msalign
ENSP00000368390.4	ENST00000379096.9	ENSG00000076554.15	185	2770	4000839	A->T	59	1267	19892.3	19892.2	1	184	.(M)[Acetyl]DRGEQGLLRTDPVPEEGEDVA(ATISATET)[-30.9959]LSEEEQEELRRELAKVEEEIQTLSQVLATKEKHLAEIKRKLGINSLQELKQNIAKGWQDVTATSAYKKTSETLSQAGQKASAAFSSVGSVITKKLEDVKNSPTFKSFEEKVENLKSKVGGTKPAGGDFGEVLNSAANASATTTEPLPEKTQESL.	184	8.98743e-08	./DLD_A_combined_ms2.msalign
ENSP00000357535.3	ENST00000368547.3	ENSG00000127884.4	291	2838	4001231	T->I	75	1855	28336.5	28336.5	28	290	F.ASGANFEYIIAEKRGKNNTVGLIQLNRPKALNALCDGLIDELNQALKIFEEDPAVGAIVLTGGDKAFAAGADIKEMQNLSFQDCYSSKFLKHWDHLTQVKKPVIAAVNGYAFGGGCELAMMCDIIYAGEKAQFAQPEILIGTIPGAGGTQRLTRAVGKSLAMEMVLTGDRISAQDAKQAGLVSKICPVETLVEEAIQCAEKIASNSKIVVAMAKESVNAAFEMTLTEGSKLEKKLFYSTFATDDRKEGMTAFVEKRKANFKDQ.	263	1.59385e-10	./DLD_A_combined_ms2.msalign
ENSP00000344901.5	ENST00000348499.9	ENSG00000160221.17	238	2858	4001370	V->A	6	2063	24754.6	24755	1	237	.(M)[Acetyl]AAVRALVASRLAAASAFTSLSPGGRTPSQRAALHLSVPRPAARVALVLSGCGVYDGTEIHEASAILVHLSRGGAEVQIFAPDVPQMHVIDHTKGQPSEGESRLVLTESARIARGKITDLANLSAANHDAAIFPGGFGAAKNLLCCIAPVLAAKVLRGVEVTVGHEQEEGGKWPYAGTAEAIKALGAKHCVKEVVEAHVDQKNKVVTTPAFMCETALHYIHDGIGAMVRKVLELTGK.	237	0.272704	./DLD_A_combined_ms2.msalign
ENSP00000221233.3	ENST00000221233.8	ENSG00000077348.8	236	2886	4001504	T->M	5	2264	25304.9	25304.9	1	235	.(M)[Acetyl]EEEMHTDAKIRAENGTGSSPRGPGCSLRHFACEQNLLSRPDGSASFLQGDTSVLAGVYGPAEVKVSKEIFNKATLEVILRPKIGLPGVAEKSRERLIRNTCEAVVLGTLHPRTSITVVLQVVSDAGSLLACCLNAACMALVDAGVPMRALFCGVACALDSDGTLVLDPTSKQEKEARAVLTFALDSVERKLLMSSTKGLYSDTELQQCLAAAQAASQHVFRFYRESLQRRYSKS.	235	0.000773376	./DLD_A_combined_ms2.msalign
